# Supplementary material for: Impact of gender-affirming treatment on bone health in transgender and gender diverse youth
Source: PubMed Central journal article supplement — Endocr Connect. 2022 Sep 28;11(11):e220280. doi: 10.1530/EC-22-0280 (PMC9578106; doi:10.1530/ec-22-0280), 2022-09-28
Supplement: supplementary_table_1.pdf [file supplementary_table_1.pdf]

Supplemental table.

Overview of studies evaluating the effect of puberty suppression and GAH on bone mineral density in TGD youth.

| Study                 | Number of participants | Medications used                                            | Duration of treatment | Age (yrs)  | Tanner stage at PS | Outcome (Z-scores) |              |                            |                             |       |       |
|-----------------------|------------------------|-------------------------------------------------------------|-----------------------|------------|--------------------|--------------------|--------------|----------------------------|-----------------------------|-------|-------|
|                       |                        |                                                             |                       |            |                    | Parameters         | Start PS     | Start GAH                  | After GAH                   | Δ1    | Δ2    |
| Klink et al., 2014    | 19 FtM                 | Triptorelin 3.75 mg/4wk s.c.                                | 1.5 years (0.25–5.2)  | 15.0 ± 2.0 | Tanner 4           | aBMD-LS            | 0.17 ± 1.18  | -0.72±0.99§ <sub>PS</sub>  | -0.33 ± 1.12                | -0.89 | +0.39 |
|                       |                        |                                                             |                       |            |                    | BMAD-LS            | 0.28 ± 0.90  | -0.50±0.81§ <sub>PS</sub>  | 0.03±0.95§ <sub>GAH</sub>   | -0.78 | +0.53 |
|                       |                        | T i.m. every 2-4 wk at incremental dose                     | 5.4 years (2.8–7.8)   | 16.4 (2.3) |                    | aBMD-FN            | 0.36 ± 0.88  | -0.35±0.79§ <sub>PS</sub>  | -0.35±0.74§ <sub>GAH</sub>  | -0.71 | 0     |
|                       |                        |                                                             |                       |            |                    | BMAD-FN            | 0.01 ± 0.70  | -0.28 ± 0.74               | --                          | -0.29 | -     |
|                       | 15 MtF                 | Triptorelin 3.75 mg/4wk s.c.                                | 1.3 years (0.5–3.8)   | 14.9 ± 1.9 | Tanner 5           | aBMD-LS            | -0.77 ± 0.89 | -1.01 ± 0.98               | -1.36 ± 0.83                | -0.24 | -0.35 |
|                       |                        |                                                             |                       |            |                    | BMAD-LS            | -0.44 ± 1.10 | -0.90 ± 0.80               | -0.78 ± 1.03                | -0.46 | +0.12 |
|                       |                        | 17-β-estradiol orally                                       | 5.8 years (3.0–8.0)   | 16.6 ± 1.4 |                    | aBMD-FN            | -0.66 ± 0.77 | -0.95 ± 0.63               | -0.69 ± 0.74                | -0.29 | +0.26 |
|                       |                        |                                                             |                       |            |                    | BMAD-FN            | -0.93 ± 1.22 | -1.57 ± 1.74               | --                          | -0.64 | -     |
| Schagen et al., 2020~ | FtM<br>70 PS           | Triptorelin 2x 3.75 mg/2 wk s.c., then every 4 wk           | 1.8 ± (1.11) years    | 14.5 ± 2.0 | 20%<br>Tanner 2-3  | aBMD-LS            | -0.28 (0.27) | -1.30(0.43)§ <sub>PS</sub> | 0.11(0.58)§ <sub>GAH</sub>  | -1.02 | +1.41 |
|                       |                        |                                                             |                       |            |                    | BMAD-LS            | -0.15 (0.29) | -1.01(0.49)§ <sub>PS</sub> | 0.12 (0.51)§ <sub>GAH</sub> | -0.86 | +1.13 |
|                       |                        |                                                             |                       |            |                    | aBMD-FN            | 0.09 (0.26)  | -0.82(0.33)§ <sub>PS</sub> | 0.59 (0.43)§ <sub>GAH</sub> | -0.91 | +1.41 |
|                       |                        |                                                             |                       |            |                    | BMAD-FN            | -0.23 (0.25) | -0.71(0.37)§ <sub>PS</sub> | 0.01 (0.43)§ <sub>GAH</sub> | -0.48 | +0.72 |
|                       | 42 GAH                 | T i.m. every 2-4 wk at incremental dose (up to 125 mg/2 wk) | 3 years               | 16.9 ± 1.1 | 80%<br>Tanner 4-5  | aBMD-LS            | 0.38 (0.14)  | -0.68(0.16)§ <sub>PS</sub> | -0.26(0.22)§ <sub>GAH</sub> | -1.06 | +0.42 |
|                       |                        |                                                             |                       |            |                    | BMAD-LS            | 0.33 (0.14)  | -0.61(0.18)§ <sub>PS</sub> | -0.04(0.18)§ <sub>GAH</sub> | -0.94 | +0.57 |
|                       |                        |                                                             |                       |            |                    | aBMD-FN            | 0.93 (0.01)  | -0.50(0.12)§ <sub>PS</sub> | 0.12(0.16)§ <sub>GAH</sub>  | -1.43 | +0.62 |
|                       |                        |                                                             |                       |            |                    | BMAD-FN            | 0.04 (0.12)  | -0.41(0.14)§ <sub>PS</sub> | -0.10(0.16)                 | -0.45 | +0.31 |
|                       | MtF                    | Triptorelin 2x 3.75 mg/2                                    | 2.0 ± (0.94) years    | 14.1 ± 1.7 | 30%<br>Tanner 2-3  | aBMD-LS            | -0.67 (0.26) | -1.37(0.30)§ <sub>PS</sub> | -0.82(0.39)§ <sub>GAH</sub> | -0.70 | +0.55 |
|                       |                        |                                                             |                       |            |                    | BMAD-LS            | -0.33 (0.33) | -1.39(0.36)§ <sub>PS</sub> | -0.49(0.40)§ <sub>GAH</sub> | -1.06 | +0.9  |

Supplemental table.

Overview of studies evaluating the effect of puberty suppression and GAH on bone mineral density in TGD youth.

|                   |                       |                                                |                                                          |                        |                                  |            |                    |                             |                               |                  |       |       |
|-------------------|-----------------------|------------------------------------------------|----------------------------------------------------------|------------------------|----------------------------------|------------|--------------------|-----------------------------|-------------------------------|------------------|-------|-------|
|                   | 51 PS                 | wk s.c., then every 4 wk                       |                                                          |                        |                                  | aBMD-FN    | -0.49 (0.24)       | -0.99(0.23) $\S_{PS}$       | -0.09(0.28) $\S_{GAH}$        | -0.50            | +0.90 |       |
|                   |                       |                                                |                                                          |                        |                                  | BMAD-FN    | -0.94 (0.27)       | -0.88 (0.23)                | -0.35(0.37) $\S_{GAH}$        | +0.06            | +0.53 |       |
|                   | 36 GAH                | 17- $\beta$ -estradiol orally (up to 2 mg/day) | 3 years                                                  | 16.2 $\pm$ 1.2         | 70% Tanner 4-5                   | aBMD-LS    | -0.33 (0.17)       | -0.99(0.19) $\S_{PS}$       | -1.05 (0.25)                  | -0.66            | -0.06 |       |
|                   |                       |                                                |                                                          |                        |                                  | BMAD-LS    | -0.65 (0.20)       | -1.29(0.23) $\S_{PS}$       | -0.50(0.25) $\S_{GAH}$        | -0.64            | +0.79 |       |
|                   |                       |                                                |                                                          |                        |                                  | aBMD-FN    | -0.43 (0.16)       | -0.86(0.14) $\S_{PS}$       | -0.70 (0.18)                  | -0.43            | -0.16 |       |
|                   |                       |                                                |                                                          |                        |                                  | BMAD-FN    | -1.01 (0.17)       | -1.36(0.20) $\S_{PS}$       | -1.21(0.24) $\S_{GAH}$        | -0.35            | +0.15 |       |
|                   | Stoffers et al., 2019 | 62 FtM                                         | Triptorelin 3.75 mg/4wk s.c.                             | 0.67 years (0.25-3.25) | 16.5 (11.8-18.0)                 | Tanner 3-5 | aBMD-LS            | 0.02 $\pm$ 1.00             | -0.81 $\pm$ 1.02 $\S_{PS}$    | -0.66 $\pm$ 0.81 | -0.83 | +0.15 |
|                   |                       |                                                | T i.m. every 2wk at incremental dose (up to 250 mg/4 wk) | 1 year (0.42-2.75)     | 17.2 (14.9-18.4)                 |            | aBMD-TH            | -0.19 $\pm$ 1.04            | -1.07 $\pm$ 0.85 $\S_{PS}$    | -0.93 $\pm$ 0.63 | -0.88 | +0.14 |
| Vlot et al., 2017 | 42 FtM                | Triptorelin 3.75 mg/4 wk s.c.                  | 1.2 years                                                | 15.1 (11.7-18.6)       | Tanner 2-5<br>Young group: BA<14 | BMAD-LS    | -0.05 (-0.78-2.94) | -0.84 $\S_{PS}$ (-2.2-0.87) | -0.15 $\S_{GAH}$ (-1.38-0.94) | -0.79            | +0.69 |       |
|                   |                       |                                                |                                                          |                        |                                  | BMAD-TH    | -0.01 (-1.30-0.91) | -0.37 (-2.28-0.47)          | -0.37 $\S_{GAH}$ (-2.03-0.85) | -0.36            | 0     |       |

Supplemental table.

Overview of studies evaluating the effect of puberty suppression and GAH on bone mineral density in TGD youth.

|  |        |                                                                                                        |           |                     |                    |         |                       |                                     |                                      |       |       |
|--|--------|--------------------------------------------------------------------------------------------------------|-----------|---------------------|--------------------|---------|-----------------------|-------------------------------------|--------------------------------------|-------|-------|
|  |        | T starting with 25 mg/m <sup>2</sup> /2 wk i.m, increasing every 6 months up to 250 mg/4 wk.           | 2 years   | 16.3<br>(15.9–19.5) | Tanner 2-5         | BMAD-LS | 0.27<br>(-1.6–1.8)    | -0.29 $\delta_{PS}$<br>(-2.28–0.90) | -0.06 $\delta_{GAH}$<br>(-1.76–1.61) | -0.56 | +0.23 |
|  |        |                                                                                                        |           |                     | Old group: BA>14   | BMAD-TH | 0.27<br>(-1.39–1.32)  | -0.27 $\delta_{PS}$<br>(-1.91–1.29) | 0.02 $\delta_{GAH}$<br>(-2.1–1.35)   | -0.54 | +0.29 |
|  | 28 MtF | Triptorelin 3.75 mg/4 wk s.c.                                                                          | 2.5 years | 13.5<br>(11.5–18.3) | Tanner 2-5         | BMAD-LS | -0.2<br>(-1.82–1.18)  | -1.52 $\delta_{PS}$<br>(-2.36–0.42) | -1.10 $\delta_{GAH}$<br>(-2.44–0.69) | -1.32 | +0.42 |
|  |        |                                                                                                        |           |                     | Young group: BA<15 | BMAD-TH | -0.71<br>(-3.35–0.37) | -1.32<br>(-3.39–0.21)               | -1.3<br>(-3.51–0.92)                 | -0.61 | +0.02 |
|  |        | 17- $\beta$ -estradiol starting with 5 $\mu$ g/kg/day increasing every 6 months up to 2 mg/day, orally | 2 years   | 16.0<br>(14.0–18.9) | Tanner 2-5         | BMAD-LS | -1.18<br>(-1.78–1.09) | -1.15<br>(-2.21–0.08)               | -0.66 $\delta_{GAH}$<br>(-1.66–0.54) | +0.03 | +0.49 |
|  |        |                                                                                                        |           |                     | Old group: BA>15   | BMAD-TH | -0.44<br>(1.37–0.93)  | -0.36<br>(-1.5–0.46)                | -0.56<br>(-2.17–1.29)                | +0.08 | -0.20 |

Values are expressed as mean  $\pm$  SD; median (IQR) or median (range). Z-scores are calculated using a normative population matched for age and sex assigned at birth.

$\Delta 1$ : absolute difference between mean or median Z-score at the start of PS and mean or median Z-score at the start of GAH.

Supplemental table.

Overview of studies evaluating the effect of puberty suppression and GAH on bone mineral density in TGD youth.

$\Delta 2$ : absolute difference between mean or median Z-score at the start of GAH and mean or median Z-score at the re-evaluation after GAH.

$\S_{PS}$ : significant decrease during puberty suppression.

$\S_{GAH}$ : significant increase after GAH.

~ In this table the outcome is shown at the start of PS, at start of GAH and 3 years after, with the first outcome referring to the whole cohort of patients. In the original work, the authors also show the outcome after 2 and 3 years of puberty suppression in specific subgroups of patients.

Abbreviations: aBMD: areal bone mineral density; BA: bone age; BMAD: apparent bone mineral density; FN: femoral neck; GAH: gender affirming hormones; i.m.: intramuscular; LS: lumbar spine; PS: puberty suppression; s.c.: subcutaneously; T: testosterone; TH: total hip.
